# Supplementary material
Source: PubMed Central journal article supplement (PMC2879655)
Supplement: NIHMS196773-supplement-SI.pdf [file NIHMS196773-supplement-SI.pdf]

## Supplementary material

**Table S1.** Complete Crystallographic Details for [Fe(TEtP)(Cl)].

|                                           |                                                                      |
|-------------------------------------------|----------------------------------------------------------------------|
| formula                                   | $C_{28}H_{28}ClFeN_4$                                                |
| FW, amu                                   | 511.84                                                               |
| $a$ , Å                                   | 10.1710(5)                                                           |
| $b$ , Å                                   | 11.309(3)                                                            |
| $c$ , Å                                   | 12.170(3)                                                            |
| $\alpha$ , deg                            | 91.774(9)                                                            |
| $\beta$ , deg                             | 113.170(14)                                                          |
| $\gamma$ , deg                            | 112.149(9)                                                           |
| $V$ , Å <sup>3</sup>                      | 1165.2(4)                                                            |
| space group                               | $P\bar{1}$                                                           |
| $Z$                                       | 2                                                                    |
| $D_c$ , g/cm <sup>3</sup>                 | 1.459                                                                |
| F(000)                                    | 534                                                                  |
| $\mu$ , mm <sup>-1</sup>                  | 0.787                                                                |
| power and current settings                | 50kV, 40mA                                                           |
| detector distance, mm                     | 40                                                                   |
| detector tilt angle, deg                  | -25                                                                  |
| image time, sec                           | 30                                                                   |
| increment, deg                            | 0.4                                                                  |
| crystal dimensions, mm                    | $0.43 \times 0.30 \times 0.03$                                       |
| radiation                                 | MoK $\alpha$ , $\bar{\lambda} = 0.71073$ Å                           |
| temperature, K                            | 130(2)                                                               |
| diffractometer                            | Enraf Nonius FAST                                                    |
| $\theta$ range for collected data, deg    | 2.31–29.75                                                           |
| index range                               | $-12 \leq h \leq 14$<br>$-15 \leq k \leq 15$<br>$-16 \leq l \leq 10$ |
| total data collected                      | 10744                                                                |
| absorption correction                     | DIFABS                                                               |
| relative transmission coefficients (I)    | 1.000 and 0.684                                                      |
| unique data                               | 5831 ( $R_{\text{int}} = 0.0983$ )                                   |
| unique observed data [ $I > 2\sigma(I)$ ] | 4545                                                                 |
| refinement method                         | Full-matrix least-squares on $F^2$                                   |
| data/restraints/parameters                | 5831/0/311                                                           |
| goodness-of-fit (based on $F^2$ )         | 1.055                                                                |
| $\max(\Delta\rho)$ , e/Å <sup>3</sup>     | 2.156                                                                |
| $\min(\Delta\rho)$ , e/Å <sup>3</sup>     | -1.094                                                               |
| final $R$ indices [ $I > 2\sigma(I)$ ]    | $R_1 = 0.0844$ , $wR_2 = 0.2073$                                     |
| final $R$ indices (all data)              | $R_1 = 0.1060$ , $wR_2 = 0.2254$                                     |

**Table S2.** Atomic Coordinates and Equivalent Isotropic Displacement Parameters ( $\text{\AA}^2$ ) for  $[\text{Fe}(\text{TEtP})(\text{Cl})]^a$

| atom  | $x$         | $y$         | $z$         | $U(\text{eq})$ |
|-------|-------------|-------------|-------------|----------------|
| Fe(1) | 0.40905(7)  | 0.28864(5)  | 0.32123(5)  | 0.0274(2)      |
| Cl    | 0.51041(14) | 0.19808(11) | 0.22573(10) | 0.0394(3)      |
| N(1)  | 0.2017(4)   | 0.1327(3)   | 0.2915(3)   | 0.0267(7)      |
| N(2)  | 0.2728(4)   | 0.3526(3)   | 0.1851(3)   | 0.0285(7)      |
| N(3)  | 0.5733(4)   | 0.4789(3)   | 0.3883(3)   | 0.0277(7)      |
| N(4)  | 0.5040(4)   | 0.2575(3)   | 0.4946(3)   | 0.0268(7)      |
| C(a1) | 0.1885(5)   | 0.0335(4)   | 0.3565(4)   | 0.0282(8)      |
| C(a2) | 0.0591(5)   | 0.0884(4)   | 0.1876(4)   | 0.0320(9)      |
| C(a3) | 0.1206(6)   | 0.2782(5)   | 0.0958(4)   | 0.0362(10)     |
| C(a4) | 0.3275(6)   | 0.4693(5)   | 0.1485(4)   | 0.0387(10)     |
| C(a5) | 0.5870(5)   | 0.5778(4)   | 0.3236(4)   | 0.0320(9)      |
| C(a6) | 0.7118(5)   | 0.5265(4)   | 0.4952(4)   | 0.0305(8)      |
| C(a7) | 0.6523(5)   | 0.3342(4)   | 0.5864(4)   | 0.0314(8)      |
| C(a8) | 0.4491(5)   | 0.1415(4)   | 0.5316(4)   | 0.0294(8)      |
| C(b1) | 0.0353(5)   | -0.0727(5)  | 0.2910(5)   | 0.0389(10)     |
| C(b2) | -0.0425(5)  | -0.0390(5)  | 0.1892(5)   | 0.0394(10)     |
| C(b3) | 0.0800(7)   | 0.3512(6)   | 0.0042(5)   | 0.0522(14)     |
| C(b4) | 0.2045(8)   | 0.4669(6)   | 0.0359(5)   | 0.0546(15)     |
| C(b5) | 0.7355(6)   | 0.6882(4)   | 0.3922(5)   | 0.0386(10)     |
| C(b6) | 0.8105(5)   | 0.6570(4)   | 0.4968(5)   | 0.0375(10)     |
| C(b7) | 0.6891(6)   | 0.2639(5)   | 0.6813(4)   | 0.0421(11)     |
| C(b8) | 0.5670(6)   | 0.1463(5)   | 0.6481(4)   | 0.0388(10)     |
| C(m1) | 0.3026(5)   | 0.0356(4)   | 0.4680(4)   | 0.0293(8)      |
| C(m2) | 0.0194(5)   | 0.1543(5)   | 0.0954(4)   | 0.0353(9)      |
| C(m3) | 0.4736(6)   | 0.5744(4)   | 0.2109(4)   | 0.0383(10)     |
| C(m4) | 0.7511(5)   | 0.4599(4)   | 0.5891(4)   | 0.0323(9)      |
| C(11) | 0.2642(6)   | -0.0806(4)  | 0.5279(4)   | 0.0371(10)     |
| C(21) | -0.1465(6)  | 0.0917(6)   | -0.0078(5)  | 0.0493(13)     |
| C(31) | 0.5093(9)   | 0.6915(5)   | 0.1510(5)   | 0.0617(17)     |
| C(41) | 0.9127(5)   | 0.5273(5)   | 0.6983(4)   | 0.0437(11)     |
| C(12) | 0.1997(6)   | -0.0638(5)  | 0.6170(5)   | 0.0408(10)     |
| C(22) | -0.2637(7)  | 0.1220(7)   | 0.0263(6)   | 0.0598(16)     |
| C(32) | 0.5679(11)  | 0.6774(6)   | 0.0592(6)   | 0.085(3)       |
| C(42) | 1.0404(6)   | 0.5008(8)   | 0.6804(5)   | 0.0624(17)     |

<sup>a</sup>  $U(\text{eq})$  is defined as one third of the trace of the orthogonalized  $U_{ij}$  tensor. The estimated standard deviations of the least significant digits are given in parentheses.

**Table S3.** Bond Lengths for [Fe(TEtP)(Cl)]<sup>a</sup>

| bond        | length (Å) | bond        | length (Å) |
|-------------|------------|-------------|------------|
| Fe(1)–N(3)  | 2.048(3)   | C(a5)–C(m3) | 1.390(6)   |
| Fe(1)–N(4)  | 2.051(3)   | C(a5)–C(b5) | 1.435(6)   |
| Fe(1)–N(2)  | 2.052(3)   | C(a6)–C(m4) | 1.398(6)   |
| Fe(1)–N(1)  | 2.060(3)   | C(a6)–C(b6) | 1.433(6)   |
| Fe(1)–Cl    | 2.2644(13) | C(a7)–C(m4) | 1.388(6)   |
| N(1)–C(a2)  | 1.386(5)   | C(a7)–C(b7) | 1.431(6)   |
| N(1)–C(a1)  | 1.389(5)   | C(a8)–C(m1) | 1.394(6)   |
| N(2)–C(a3)  | 1.387(6)   | C(a8)–C(b8) | 1.435(6)   |
| N(2)–C(a4)  | 1.389(5)   | C(b1)–C(b2) | 1.338(7)   |
| N(3)–C(a6)  | 1.382(5)   | C(b3)–C(b4) | 1.341(9)   |
| N(3)–C(a5)  | 1.383(5)   | C(b5)–C(b6) | 1.339(7)   |
| N(4)–C(a7)  | 1.379(5)   | C(b7)–C(b8) | 1.342(7)   |
| N(4)–C(a8)  | 1.385(5)   | C(m1)–C(11) | 1.519(6)   |
| C(a1)–C(m1) | 1.388(6)   | C(m2)–C(21) | 1.518(6)   |
| C(a1)–C(b1) | 1.434(6)   | C(m3)–C(31) | 1.524(6)   |
| C(a2)–C(m2) | 1.379(6)   | C(m4)–C(41) | 1.523(6)   |
| C(a2)–C(b2) | 1.428(6)   | C(11)–C(12) | 1.512(7)   |
| C(a3)–C(m2) | 1.390(7)   | C(21)–C(22) | 1.548(8)   |
| C(a3)–C(b3) | 1.431(6)   | C(31)–C(32) | 1.488(10)  |
| C(a4)–C(m3) | 1.386(7)   | C(41)–C(42) | 1.529(8)   |
| C(a4)–C(b4) | 1.438(7)   |             |            |

<sup>a</sup>The estimated standard deviations of the least significant digits are given in parentheses.

**Table S4.** Bond Angles for [Fe(TEtP)(Cl)]<sup>a</sup>

| angle             | degree     | angle             | degree   |
|-------------------|------------|-------------------|----------|
| N(3)–Fe(1)–N(4)   | 87.45(14)  | N(3)–C(a5)–C(b5)  | 109.8(4) |
| N(3)–Fe(1)–N(2)   | 87.49(14)  | C(m3)–C(a5)–C(b5) | 124.2(4) |
| N(4)–Fe(1)–N(2)   | 155.21(14) | N(3)–C(a6)–C(m4)  | 126.1(4) |
| N(3)–Fe(1)–N(1)   | 154.47(14) | N(3)–C(a6)–C(b6)  | 109.5(4) |
| N(4)–Fe(1)–N(1)   | 87.54(14)  | C(m4)–C(a6)–C(b6) | 124.4(4) |
| N(2)–Fe(1)–N(1)   | 86.66(14)  | N(4)–C(a7)–C(m4)  | 126.4(4) |
| N(3)–Fe(1)–Cl     | 103.55(11) | N(4)–C(a7)–C(b7)  | 109.0(4) |
| N(4)–Fe(1)–Cl     | 101.75(10) | C(m4)–C(a7)–C(b7) | 124.6(4) |
| N(2)–Fe(1)–Cl     | 103.03(11) | N(4)–C(a8)–C(m1)  | 126.4(4) |
| N(1)–Fe(1)–Cl     | 101.98(10) | N(4)–C(a8)–C(b8)  | 109.3(4) |
| C(a2)–N(1)–C(a1)  | 105.9(3)   | C(m1)–C(a8)–C(b8) | 124.3(4) |
| C(a2)–N(1)–Fe(1)  | 126.7(3)   | C(b2)–C(b1)–C(a1) | 107.7(4) |
| C(a1)–N(1)–Fe(1)  | 125.5(3)   | C(b1)–C(b2)–C(a2) | 108.0(4) |
| C(a3)–N(2)–C(a4)  | 106.3(3)   | C(b4)–C(b3)–C(a3) | 107.9(4) |
| C(a3)–N(2)–Fe(1)  | 126.7(3)   | C(b3)–C(b4)–C(a4) | 107.9(5) |
| C(a4)–N(2)–Fe(1)  | 125.5(3)   | C(b6)–C(b5)–C(a5) | 107.2(4) |
| C(a6)–N(3)–C(a5)  | 105.6(3)   | C(b5)–C(b6)–C(a6) | 107.8(4) |
| C(a6)–N(3)–Fe(1)  | 126.5(3)   | C(b8)–C(b7)–C(a7) | 108.3(4) |
| C(a5)–N(3)–Fe(1)  | 126.3(3)   | C(b7)–C(b8)–C(a8) | 107.1(4) |
| C(a7)–N(4)–C(a8)  | 106.3(3)   | C(a1)–C(m1)–C(a8) | 123.6(4) |
| C(a7)–N(4)–Fe(1)  | 126.2(3)   | C(a1)–C(m1)–C(11) | 118.7(4) |
| C(a8)–N(4)–Fe(1)  | 125.7(3)   | C(a8)–C(m1)–C(11) | 117.6(4) |
| C(m1)–C(a1)–N(1)  | 126.3(4)   | C(a2)–C(m2)–C(a3) | 123.3(4) |
| C(m1)–C(a1)–C(b1) | 124.7(4)   | C(a2)–C(m2)–C(21) | 118.2(5) |
| N(1)–C(a1)–C(b1)  | 109.1(4)   | C(a3)–C(m2)–C(21) | 118.4(4) |
| C(m2)–C(a2)–N(1)  | 126.3(4)   | C(a4)–C(m3)–C(a5) | 123.6(4) |
| C(m2)–C(a2)–C(b2) | 124.4(4)   | C(a4)–C(m3)–C(31) | 117.3(5) |
| N(1)–C(a2)–C(b2)  | 109.3(4)   | C(a5)–C(m3)–C(31) | 119.1(5) |
| N(2)–C(a3)–C(m2)  | 126.3(4)   | C(a7)–C(m4)–C(a6) | 123.3(4) |
| N(2)–C(a3)–C(b3)  | 109.2(4)   | C(a7)–C(m4)–C(41) | 118.4(4) |
| C(m2)–C(a3)–C(b3) | 124.5(4)   | C(a6)–C(m4)–C(41) | 118.3(4) |
| C(m3)–C(a4)–N(2)  | 126.6(4)   | C(12)–C(11)–C(m1) | 112.9(4) |
| C(m3)–C(a4)–C(b4) | 124.6(4)   | C(m2)–C(21)–C(22) | 111.4(4) |
| N(2)–C(a4)–C(b4)  | 108.8(4)   | C(32)–C(31)–C(m3) | 113.9(6) |
| N(3)–C(a5)–C(m3)  | 125.9(4)   | C(m4)–C(41)–C(42) | 112.9(4) |

<sup>a</sup>The estimated standard deviations of the least significant digits are given in parentheses.

**Table S5.** Anisotropic Displacement Parameters ( $\text{\AA}^2$ ) for  $[\text{Fe}(\text{TEtP})(\text{Cl})]^a$ 

| atom  | $U_{11}$   | $U_{22}$   | $U_{33}$   | $U_{23}$    | $U_{13}$    | $U_{12}$   |
|-------|------------|------------|------------|-------------|-------------|------------|
| Fe(1) | 0.0276(3)  | 0.0270(3)  | 0.0222(3)  | 0.0061(2)   | 0.0061(2)   | 0.0111(2)  |
| Cl    | 0.0448(6)  | 0.0414(6)  | 0.0361(6)  | 0.0071(4)   | 0.0176(5)   | 0.0224(5)  |
| N(1)  | 0.0225(15) | 0.0298(16) | 0.0267(16) | 0.0024(13)  | 0.0090(13)  | 0.0121(13) |
| N(2)  | 0.0365(18) | 0.0305(16) | 0.0187(14) | 0.0071(12)  | 0.0090(13)  | 0.0175(14) |
| N(3)  | 0.0312(17) | 0.0240(15) | 0.0246(15) | 0.0035(12)  | 0.0098(13)  | 0.0112(13) |
| N(4)  | 0.0275(16) | 0.0295(16) | 0.0240(15) | 0.0063(12)  | 0.0103(13)  | 0.0138(13) |
| C(a1) | 0.0290(19) | 0.0300(18) | 0.032(2)   | 0.0066(15)  | 0.0186(16)  | 0.0137(15) |
| C(a2) | 0.0268(19) | 0.034(2)   | 0.032(2)   | −0.0020(16) | 0.0103(16)  | 0.0130(16) |
| C(a3) | 0.042(2)   | 0.044(2)   | 0.0225(19) | 0.0056(17)  | 0.0055(17)  | 0.026(2)   |
| C(a4) | 0.056(3)   | 0.037(2)   | 0.025(2)   | 0.0122(17)  | 0.0149(19)  | 0.024(2)   |
| C(a5) | 0.045(2)   | 0.0250(18) | 0.033(2)   | 0.0063(15)  | 0.0241(19)  | 0.0150(17) |
| C(a6) | 0.0297(19) | 0.0304(19) | 0.031(2)   | 0.0015(15)  | 0.0137(16)  | 0.0120(16) |
| C(a7) | 0.030(2)   | 0.041(2)   | 0.0221(18) | 0.0049(16)  | 0.0078(15)  | 0.0174(17) |
| C(a8) | 0.034(2)   | 0.035(2)   | 0.0277(19) | 0.0130(16)  | 0.0154(16)  | 0.0207(17) |
| C(b1) | 0.034(2)   | 0.033(2)   | 0.049(3)   | 0.0035(19)  | 0.024(2)    | 0.0081(18) |
| C(b2) | 0.026(2)   | 0.039(2)   | 0.042(3)   | −0.0016(19) | 0.0102(18)  | 0.0086(17) |
| C(b3) | 0.060(3)   | 0.054(3)   | 0.029(2)   | 0.012(2)    | 0.001(2)    | 0.029(3)   |
| C(b4) | 0.074(4)   | 0.053(3)   | 0.034(3)   | 0.021(2)    | 0.012(3)    | 0.035(3)   |
| C(b5) | 0.042(2)   | 0.0260(19) | 0.052(3)   | 0.0041(18)  | 0.029(2)    | 0.0099(18) |
| C(b6) | 0.026(2)   | 0.033(2)   | 0.049(3)   | 0.0002(18)  | 0.0188(19)  | 0.0069(16) |
| C(b7) | 0.039(2)   | 0.054(3)   | 0.026(2)   | 0.0099(19)  | 0.0052(18)  | 0.022(2)   |
| C(b8) | 0.044(2)   | 0.051(3)   | 0.028(2)   | 0.0178(19)  | 0.0135(19)  | 0.028(2)   |
| C(m1) | 0.036(2)   | 0.0308(19) | 0.0309(19) | 0.0096(15)  | 0.0190(17)  | 0.0191(16) |
| C(m2) | 0.032(2)   | 0.042(2)   | 0.0241(19) | −0.0030(16) | 0.0027(16)  | 0.0193(18) |
| C(m3) | 0.058(3)   | 0.029(2)   | 0.032(2)   | 0.0122(17)  | 0.022(2)    | 0.020(2)   |
| C(m4) | 0.0274(19) | 0.039(2)   | 0.0275(19) | 0.0011(16)  | 0.0090(16)  | 0.0149(17) |
| C(11) | 0.048(3)   | 0.034(2)   | 0.040(2)   | 0.0154(18)  | 0.025(2)    | 0.0206(19) |
| C(21) | 0.034(2)   | 0.064(3)   | 0.031(2)   | −0.005(2)   | −0.0019(19) | 0.021(2)   |
| C(31) | 0.094(5)   | 0.033(2)   | 0.043(3)   | 0.016(2)    | 0.027(3)    | 0.015(3)   |
| C(41) | 0.027(2)   | 0.055(3)   | 0.032(2)   | −0.004(2)   | 0.0034(17)  | 0.012(2)   |
| C(12) | 0.045(3)   | 0.033(2)   | 0.048(3)   | 0.0113(19)  | 0.029(2)    | 0.0122(19) |
| C(22) | 0.040(3)   | 0.078(4)   | 0.054(3)   | −0.004(3)   | 0.004(2)    | 0.036(3)   |
| C(32) | 0.121(7)   | 0.045(3)   | 0.057(4)   | 0.006(3)    | 0.051(4)    | −0.009(4)  |
| C(42) | 0.034(3)   | 0.104(5)   | 0.043(3)   | −0.002(3)   | 0.007(2)    | 0.034(3)   |

<sup>a</sup>The estimated standard deviations of the least significant digits are given in parentheses. The anisotropic displacement factor exponent takes the form:  $-2 \pi [h^2 a^{*2} U_{11} + \dots + 2 h k a^* b^* U_{12}]$ .

**Table S6.** Hydrogen Atom Coordinates and Equivalent Isotropic Displacement Parameters ( $\text{\AA}^2$ ) for  $[\text{Fe}(\text{TEtP})(\text{Cl})]^a$

| atom   | $x$     | $y$     | $z$     | $U(\text{eq})$ |
|--------|---------|---------|---------|----------------|
| H(b1)  | -0.0039 | -0.1526 | 0.3154  | 0.047          |
| H(b2)  | -0.1470 | -0.0907 | 0.1287  | 0.047          |
| H(b3)  | -0.0178 | 0.3228  | -0.0666 | 0.063          |
| H(b4)  | 0.2104  | 0.5351  | -0.0082 | 0.066          |
| H(b5)  | 0.7734  | 0.7685  | 0.3680  | 0.046          |
| H(b6)  | 0.9113  | 0.7117  | 0.5607  | 0.045          |
| H(b7)  | 0.7837  | 0.2951  | 0.7552  | 0.050          |
| H(b8)  | 0.5600  | 0.0789  | 0.6932  | 0.047          |
| H(11a) | 0.1856  | -0.1600 | 0.4635  | 0.045          |
| H(11b) | 0.3611  | -0.0939 | 0.5715  | 0.045          |
| H(21a) | -0.1819 | -0.0040 | -0.0264 | 0.059          |
| H(21b) | -0.1459 | 0.1247  | -0.0821 | 0.059          |
| H(31a) | 0.4121  | 0.7051  | 0.1106  | 0.074          |
| H(31b) | 0.5895  | 0.7703  | 0.2155  | 0.074          |
| H(41a) | 0.9051  | 0.4971  | 0.7719  | 0.052          |
| H(41b) | 0.9440  | 0.6227  | 0.7126  | 0.052          |
| H(12a) | 0.1741  | -0.1423 | 0.6509  | 0.061          |
| H(12b) | 0.1042  | -0.0500 | 0.5746  | 0.061          |
| H(12c) | 0.2792  | 0.0119  | 0.6834  | 0.061          |
| H(22a) | -0.3700 | 0.0785  | -0.0411 | 0.090          |
| H(22b) | -0.2315 | 0.2166  | 0.0413  | 0.090          |
| H(22c) | -0.2637 | 0.0902  | 0.1003  | 0.090          |
| H(32a) | 0.6661  | 0.6668  | 0.0989  | 0.128          |
| H(32b) | 0.5877  | 0.7556  | 0.0242  | 0.128          |
| H(32c) | 0.4884  | 0.6006  | -0.0060 | 0.128          |
| H(42a) | 1.1436  | 0.5546  | 0.7484  | 0.094          |
| H(42b) | 1.0415  | 0.5224  | 0.6033  | 0.094          |
| H(42c) | 1.0180  | 0.4083  | 0.6781  | 0.094          |

<sup>a</sup> $U(\text{eq})$  is defined as one third of the trace of the orthogonalized  $\mathbf{U}_{ij}$  tensor. The estimated standard deviations of the least significant digits are given in parentheses.

**Table S7.** Complete Crystallographic Details for [Fe(TPrP)(Cl)].

|                                                              |                                                                  |
|--------------------------------------------------------------|------------------------------------------------------------------|
| formula                                                      | C <sub>32</sub> H <sub>36</sub> ClFeN <sub>4</sub>               |
| FW, amu                                                      | 567.95                                                           |
| <i>a</i> , Å                                                 | 13.040(2)                                                        |
| <i>b</i> , Å                                                 | 15.221(2)                                                        |
| <i>c</i> , Å                                                 | 14.6681(9)                                                       |
| $\beta$ , deg                                                | 109.997(11)                                                      |
| <i>V</i> , Å <sup>3</sup>                                    | 2735.9(7)                                                        |
| space group                                                  | P2(1)/n                                                          |
| <i>Z</i>                                                     | 4                                                                |
| D <sub>c</sub> , g/cm <sup>3</sup>                           | 1.379                                                            |
| F(000)                                                       | 1196                                                             |
| $\mu$ , mm <sup>-1</sup>                                     | 0.678                                                            |
| power and current settings                                   | 50kV, 40mA                                                       |
| detector distance, mm                                        | 40                                                               |
| detector tilt angle, deg                                     | -25                                                              |
| image time, sec                                              | 20                                                               |
| increment, deg                                               | 0.25                                                             |
| crystal dimensions, mm                                       | 0.35 × 0.33 × 0.30                                               |
| radiation                                                    | MoK $\alpha$ , $\bar{\lambda}$ = 0.71073 Å                       |
| temperature, K                                               | 130(2)                                                           |
| diffractometer                                               | Enraf Nonius FAST                                                |
| $\theta$ range for collected data, deg                       | 2.25–29.94                                                       |
| index range                                                  | -18 ≤ <i>h</i> ≤ 17<br>-18 ≤ <i>k</i> ≤ 21<br>-8 ≤ <i>l</i> ≤ 20 |
| total data collected                                         | 19425                                                            |
| absorption correction                                        | None                                                             |
| unique data                                                  | 7047 ( <i>R</i> <sub>int</sub> = 0.0544)                         |
| unique observed data [ <i>I</i> > 2 $\sigma$ ( <i>I</i> )]   | 6174                                                             |
| refinement method                                            | Full-matrix least-sq                                             |
| data/restraints/parameters                                   | 7047/0/347                                                       |
| goodness-of-fit (based on <i>F</i> <sup>2</sup> )            | 1.052                                                            |
| max( $\Delta\rho$ ), e/Å <sup>3</sup>                        | 0.949                                                            |
| min( $\Delta\rho$ ), e/Å <sup>3</sup>                        | -0.936                                                           |
| final <i>R</i> indices [ <i>I</i> > 2 $\sigma$ ( <i>I</i> )] | <i>R</i> <sub>1</sub> = 0.0477, <i>wR</i> <sub>2</sub> = 0.1176  |
| final <i>R</i> indices (all data)                            | <i>R</i> <sub>1</sub> = 0.0556, <i>wR</i> <sub>2</sub> = 0.1235  |

**Table S8.** Atomic Coordinates and Equivalent Isotropic Displacement Parameters ( $\text{\AA}^2$ ) for  $[\text{Fe}(\text{TPrP})(\text{Cl})]^a$

| atom  | $x$          | $y$         | $z$         | $U(\text{eq})$ |
|-------|--------------|-------------|-------------|----------------|
| Fe(1) | 0.44462(2)   | 0.16332(2)  | 0.61486(2)  | 0.0087(1)      |
| Cl(1) | 0.45108(4)   | 0.30989(3)  | 0.61265(3)  | 0.0179(1)      |
| N(1)  | 0.30107(12)  | 0.13730(10) | 0.63957(10) | 0.0114(3)      |
| N(2)  | 0.36154(11)  | 0.13041(9)  | 0.47291(10) | 0.0108(3)      |
| N(3)  | 0.58445(12)  | 0.12454(10) | 0.59135(10) | 0.0126(3)      |
| N(4)  | 0.52419(12)  | 0.13165(9)  | 0.75846(10) | 0.0109(3)      |
| C(m1) | 0.17364(14)  | 0.15512(11) | 0.47112(12) | 0.0117(3)      |
| C(m2) | 0.51424(14)  | 0.09674(11) | 0.41438(12) | 0.0127(3)      |
| C(m3) | 0.71386(14)  | 0.14100(12) | 0.75929(12) | 0.0135(3)      |
| C(m4) | 0.36868(15)  | 0.11137(11) | 0.81684(11) | 0.0137(3)      |
| C(a1) | 0.28625(14)  | 0.12531(12) | 0.72754(12) | 0.0142(3)      |
| C(a2) | 0.19830(14)  | 0.14848(11) | 0.57141(12) | 0.0129(3)      |
| C(a3) | 0.25083(13)  | 0.14293(11) | 0.42630(11) | 0.0118(3)      |
| C(a4) | 0.40433(14)  | 0.11106(11) | 0.40129(11) | 0.0124(3)      |
| C(a5) | 0.59776(14)  | 0.10498(12) | 0.50415(12) | 0.0136(3)      |
| C(a6) | 0.68813(13)  | 0.13036(12) | 0.65902(12) | 0.0132(3)      |
| C(a7) | 0.63603(14)  | 0.13540(11) | 0.80463(12) | 0.0129(3)      |
| C(a8) | 0.47972(14)  | 0.11620(11) | 0.83008(11) | 0.0126(3)      |
| C(b1) | 0.17224(15)  | 0.13001(14) | 0.71390(13) | 0.0193(4)      |
| C(b2) | 0.11807(15)  | 0.14577(13) | 0.61836(13) | 0.0179(3)      |
| C(b3) | 0.22455(14)  | 0.13294(12) | 0.32331(12) | 0.0148(3)      |
| C(b4) | 0.31836(15)  | 0.11117(12) | 0.30843(12) | 0.0160(3)      |
| C(b5) | 0.71212(15)  | 0.09721(14) | 0.51830(13) | 0.0198(4)      |
| C(b6) | 0.76764(15)  | 0.11557(14) | 0.61293(13) | 0.0199(4)      |
| C(b7) | 0.66166(15)  | 0.12425(12) | 0.90733(12) | 0.0165(3)      |
| C(b8) | 0.56590(15)  | 0.10997(12) | 0.92251(12) | 0.0159(3)      |
| C(11) | 0.05579(13)  | 0.16796(12) | 0.40807(13) | 0.0141(3)      |
| C(12) | -0.00868(15) | 0.08286(13) | 0.37917(14) | 0.0203(4)      |
| C(13) | -0.12877(16) | 0.10140(15) | 0.32360(16) | 0.0262(4)      |
| C(21) | 0.54426(15)  | 0.07472(12) | 0.32610(12) | 0.0145(3)      |
| C(22) | 0.56489(15)  | 0.15490(12) | 0.27204(13) | 0.0160(3)      |
| C(23) | 0.59004(16)  | 0.12751(14) | 0.18184(13) | 0.0199(4)      |
| C(31) | 0.83294(14)  | 0.14810(13) | 0.82131(13) | 0.0171(3)      |
| C(32) | 0.88980(15)  | 0.05922(14) | 0.84855(14) | 0.0210(4)      |



**Table S8.** Continued

| atom  | $x$         | $y$         | $z$         | $U(\text{eq})$ |
|-------|-------------|-------------|-------------|----------------|
| C(33) | 1.01076(15) | 0.06983(16) | 0.90482(14) | 0.0246(4)      |
| C(41) | 0.33527(16) | 0.09100(13) | 0.90427(12) | 0.0171(3)      |
| C(42) | 0.32081(17) | 0.17130(13) | 0.96096(13) | 0.0200(4)      |
| C(43) | 0.28739(17) | 0.14550(15) | 1.04700(14) | 0.0236(4)      |

<sup>a</sup> $U(\text{eq})$  is defined as one third of the trace of the orthogonalized  $\mathbf{U}_{ij}$  tensor. The estimated standard deviations of the least significant digits are given in parentheses.

**Table S9.** Bond Lengths for [Fe(TPrP)(Cl)]<sup>a</sup>

| bond        | length (Å) | bond        | length (Å) |
|-------------|------------|-------------|------------|
| Fe(1)–N(2)  | 2.0536(14) | C(m4)–C(a1) | 1.398(2)   |
| Fe(1)–N(3)  | 2.0548(15) | C(m4)–C(41) | 1.521(2)   |
| Fe(1)–N(4)  | 2.0618(14) | C(a1)–C(b1) | 1.432(3)   |
| Fe(1)–N(1)  | 2.0632(15) | C(a2)–C(b2) | 1.436(2)   |
| Fe(1)–Cl(1) | 2.2332(6)  | C(a3)–C(b3) | 1.438(2)   |
| N(1)–C(a1)  | 1.381(2)   | C(a4)–C(b4) | 1.438(2)   |
| N(1)–C(a2)  | 1.381(2)   | C(a5)–C(b5) | 1.438(2)   |
| N(2)–C(a4)  | 1.379(2)   | C(a6)–C(b6) | 1.436(2)   |
| N(2)–C(a3)  | 1.383(2)   | C(a7)–C(b7) | 1.437(2)   |
| N(3)–C(a6)  | 1.380(2)   | C(a8)–C(b8) | 1.438(2)   |
| N(3)–C(a5)  | 1.381(2)   | C(b1)–C(b2) | 1.358(3)   |
| N(4)–C(a8)  | 1.383(2)   | C(b3)–C(b4) | 1.355(3)   |
| N(4)–C(a7)  | 1.383(2)   | C(b5)–C(b6) | 1.357(3)   |
| C(m1)–C(a3) | 1.390(2)   | C(b7)–C(b8) | 1.359(3)   |
| C(m1)–C(a2) | 1.398(2)   | C(11)–C(12) | 1.523(3)   |
| C(m1)–C(11) | 1.511(2)   | C(12)–C(13) | 1.524(3)   |
| C(m2)–C(a4) | 1.397(2)   | C(21)–C(22) | 1.529(2)   |
| C(m2)–C(a5) | 1.398(2)   | C(22)–C(23) | 1.526(2)   |
| C(m2)–C(21) | 1.513(2)   | C(31)–C(32) | 1.529(3)   |
| C(m3)–C(a7) | 1.393(2)   | C(32)–C(33) | 1.518(3)   |
| C(m3)–C(a6) | 1.402(2)   | C(41)–C(42) | 1.526(3)   |
| C(m3)–C(31) | 1.511(2)   | C(42)–C(43) | 1.521(3)   |
| C(m4)–C(a8) | 1.395(3)   |             |            |

<sup>a</sup>The estimated standard deviations of the least significant digits are given in parentheses.

**Table S10.** Bond Angles for [Fe(TPrP)(Cl)]<sup>a</sup>

| angle             | degree     | angle             | degree     |
|-------------------|------------|-------------------|------------|
| N(2)–Fe(1)–N(3)   | 87.16(6)   | N(1)–C(a2)–C(m1)  | 125.99(16) |
| N(2)–Fe(1)–N(4)   | 152.31(6)  | N(1)–C(a2)–C(b2)  | 109.57(15) |
| N(3)–Fe(1)–N(4)   | 86.50(6)   | C(m1)–C(a2)–C(b2) | 124.29(16) |
| N(2)–Fe(1)–N(1)   | 86.30(6)   | N(2)–C(a3)–C(m1)  | 125.93(15) |
| N(3)–Fe(1)–N(1)   | 152.24(6)  | N(2)–C(a3)–C(b3)  | 109.77(14) |
| N(4)–Fe(1)–N(1)   | 86.88(6)   | C(m1)–C(a3)–C(b3) | 124.04(15) |
| N(2)–Fe(1)–Cl(1)  | 103.79(4)  | N(2)–C(a4)–C(m2)  | 126.30(14) |
| N(3)–Fe(1)–Cl(1)  | 104.15(4)  | N(2)–C(a4)–C(b4)  | 109.50(15) |
| N(4)–Fe(1)–Cl(1)  | 103.89(4)  | C(m2)–C(a4)–C(b4) | 124.16(15) |
| N(1)–Fe(1)–Cl(1)  | 103.61(4)  | N(3)–C(a5)–C(m2)  | 125.98(16) |
| C(a1)–N(1)–C(a2)  | 106.35(14) | N(3)–C(a5)–C(b5)  | 109.67(15) |
| C(a1)–N(1)–Fe(1)  | 127.95(11) | C(m2)–C(a5)–C(b5) | 124.32(16) |
| C(a2)–N(1)–Fe(1)  | 124.28(11) | N(3)–C(a6)–C(m3)  | 125.90(16) |
| C(a4)–N(2)–C(a3)  | 106.18(13) | N(3)–C(a6)–C(b6)  | 109.81(15) |
| C(a4)–N(2)–Fe(1)  | 127.86(11) | (Cm3)–C(a6)–C(b6) | 124.04(16) |
| C(a3)–N(2)–Fe(1)  | 124.56(11) | N(4)–C(a7)–C(m3)  | 125.95(15) |
| C(a6)–N(3)–C(a5)  | 106.12(14) | N(4)–C(a7)–C(b7)  | 109.67(15) |
| C(a6)–N(3)–Fe(1)  | 124.64(11) | C(m3)–C(a7)–C(b7) | 124.14(16) |
| C(a5)–N(3)–Fe(1)  | 128.12(11) | N(4)–C(a8)–C(m4)  | 126.02(15) |
| C(a8)–N(4)–C(a7)  | 106.32(13) | N(4)–C(a8)–C(b8)  | 109.38(15) |
| C(a8)–N(4)–Fe(1)  | 128.36(11) | C(m4)–C(a8)–C(b8) | 124.54(15) |
| C(a7)–N(4)–Fe(1)  | 124.65(11) | C(b2)–C(b1)–C(a1) | 107.57(16) |
| C(a3)–C(m1)–C(a2) | 123.01(15) | C(b1)–C(b2)–C(a2) | 107.02(16) |
| C(a3)–C(m1)–C(11) | 118.50(15) | C(b4)–C(b3)–C(a3) | 106.92(15) |
| C(a2)–C(m1)–C(11) | 118.24(16) | C(b3)–C(b4)–C(a4) | 107.58(15) |
| C(a4)–C(m2)–C(a5) | 123.21(15) | C(b6)–C(b5)–C(a5) | 107.15(16) |
| C(a4)–C(m2)–C(21) | 118.07(14) | C(b5)–C(b6)–C(a6) | 107.17(16) |
| C(a5)–C(m2)–C(21) | 118.67(15) | C(b8)–C(b7)–C(a7) | 107.05(15) |
| C(a7)–C(m3)–C(a6) | 122.80(15) | C(b7)–C(b8)–C(a8) | 107.50(15) |
| C(a7)–C(m3)–C(31) | 118.90(15) | C(m1)–C(11)–C(12) | 114.17(15) |
| C(a6)–C(m3)–C(31) | 117.90(16) | C(11)–C(12)–C(13) | 111.09(16) |
| C(a8)–C(m4)–C(a1) | 123.46(15) | C(m2)–C(21)–C(22) | 114.21(15) |
| C(a8)–C(m4)–C(41) | 118.44(15) | C(23)–C(22)–C(21) | 111.09(15) |
| C(a1)–C(m4)–C(41) | 118.10(16) | C(m3)–C(31)–C(32) | 113.62(15) |

**Table S10.** Continued

| angle             | degree     | angle             | degree     |
|-------------------|------------|-------------------|------------|
| N(1)–C(a1)–C(m4)  | 125.97(16) | C(33)–C(32)–C(31) | 111.64(17) |
| N(1)–C(a1)–C(b1)  | 109.46(15) | C(m4)–C(41)–C(42) | 114.88(15) |
| C(m4)–C(a1)–C(b1) | 124.57(16) | C(43)–C(42)–C(41) | 111.67(17) |

<sup>a</sup>The estimated standard deviations of the least significant digits are given in parentheses.

**Table S11.** Anisotropic Displacement Parameters ( $\text{\AA}^2$ ) for  $[\text{Fe}(\text{TPrP})(\text{Cl})]^a$ 

| atom  | $U_{11}$  | $U_{22}$   | $U_{33}$   | $U_{23}$   | $U_{13}$  | $U_{12}$   |
|-------|-----------|------------|------------|------------|-----------|------------|
| Fe(1) | 0.0126(1) | 0.0075(1)  | 0.0051(1)  | 0.0004(1)  | 0.0021(1) | 0.0000(1)  |
| Cl(1) | 0.0276(2) | 0.0085(2)  | 0.0153(2)  | 0.0010(1)  | 0.0044(2) | -0.0014(2) |
| N(1)  | 0.0152(6) | 0.0109(6)  | 0.0081(6)  | 0.0001(5)  | 0.0039(5) | -0.0007(5) |
| N(2)  | 0.0129(6) | 0.0111(6)  | 0.0073(6)  | -0.0004(5) | 0.0020(5) | 0.0004(5)  |
| N(3)  | 0.0151(6) | 0.0132(7)  | 0.0079(6)  | 0.0004(5)  | 0.0017(5) | 0.0006(5)  |
| N(4)  | 0.0162(6) | 0.0091(6)  | 0.0069(6)  | 0.0008(5)  | 0.0031(5) | 0.0002(5)  |
| C(m1) | 0.0123(7) | 0.0092(7)  | 0.0115(7)  | 0.0008(5)  | 0.0016(6) | -0.0006(5) |
| C(m2) | 0.0195(8) | 0.0108(7)  | 0.0089(7)  | -0.0001(5) | 0.0063(6) | 0.0008(6)  |
| C(m3) | 0.0158(7) | 0.0111(7)  | 0.0102(7)  | 0.0007(6)  | 0.0003(6) | 0.0005(6)  |
| C(m4) | 0.0233(8) | 0.0117(8)  | 0.0074(7)  | 0.0009(5)  | 0.0070(6) | 0.0006(6)  |
| C(a1) | 0.0193(8) | 0.0141(8)  | 0.0107(7)  | 0.0000(6)  | 0.0070(6) | -0.0013(6) |
| C(a2) | 0.0149(7) | 0.0108(7)  | 0.0128(7)  | -0.0005(6) | 0.0046(6) | -0.0007(6) |
| C(a3) | 0.0147(7) | 0.0104(7)  | 0.0081(7)  | 0.0005(5)  | 0.0011(6) | -0.0011(6) |
| C(a4) | 0.0182(8) | 0.0120(7)  | 0.0065(7)  | 0.0007(5)  | 0.0035(6) | -0.0012(6) |
| C(a5) | 0.0179(8) | 0.0129(8)  | 0.0109(7)  | 0.0014(6)  | 0.0060(6) | 0.0020(6)  |
| C(a6) | 0.0125(7) | 0.0146(8)  | 0.0118(7)  | 0.0027(6)  | 0.0030(6) | 0.0017(6)  |
| C(a7) | 0.0168(8) | 0.0103(7)  | 0.0087(7)  | -0.0006(6) | 0.0005(6) | 0.0013(6)  |
| C(a8) | 0.0213(8) | 0.0090(7)  | 0.0071(7)  | 0.0003(5)  | 0.0045(6) | 0.0009(6)  |
| C(b1) | 0.0200(8) | 0.0253(10) | 0.0157(8)  | -0.0020(7) | 0.0102(7) | -0.0018(7) |
| C(b2) | 0.0149(8) | 0.0232(9)  | 0.0168(8)  | -0.0017(7) | 0.0071(6) | -0.0003(7) |
| C(b3) | 0.0175(8) | 0.0156(8)  | 0.0088(7)  | -0.0003(6) | 0.0014(6) | -0.0028(6) |
| C(b4) | 0.0207(8) | 0.0187(9)  | 0.0075(7)  | -0.0027(6) | 0.0035(6) | -0.0026(7) |
| C(b5) | 0.0189(8) | 0.0278(10) | 0.0144(8)  | 0.0027(7)  | 0.0079(7) | 0.0048(7)  |
| C(b6) | 0.0167(8) | 0.0268(10) | 0.0167(8)  | 0.0035(7)  | 0.0062(7) | 0.0030(7)  |
| C(b7) | 0.0206(8) | 0.0181(9)  | 0.0075(7)  | 0.0007(6)  | 0.0007(6) | 0.0045(7)  |
| C(b8) | 0.0253(9) | 0.0146(8)  | 0.0062(7)  | 0.0021(6)  | 0.0035(6) | 0.0049(7)  |
| C(11) | 0.0123(7) | 0.0141(8)  | 0.0141(7)  | 0.0018(6)  | 0.0022(6) | 0.0005(6)  |
| C(12) | 0.0174(8) | 0.0167(9)  | 0.0227(9)  | 0.0014(7)  | 0.0018(7) | -0.0033(7) |
| C(13) | 0.0165(8) | 0.0285(11) | 0.0298(10) | 0.0026(8)  | 0.0029(8) | -0.0058(8) |
| C(21) | 0.0218(8) | 0.0142(8)  | 0.0096(7)  | -0.0015(6) | 0.0078(6) | 0.0016(6)  |
| C(22) | 0.0221(8) | 0.0152(8)  | 0.0127(8)  | -0.0007(6) | 0.0088(6) | -0.0015(6) |
| C(23) | 0.0248(9) | 0.0245(10) | 0.0129(8)  | -0.0002(7) | 0.0095(7) | -0.0017(7) |
| C(31) | 0.0141(8) | 0.0192(9)  | 0.0141(8)  | 0.0000(6)  | 0.0000(6) | -0.0013(6) |
| C(32) | 0.0185(8) | 0.0228(10) | 0.0177(8)  | 0.0010(7)  | 0.0007(7) | 0.0029(7)  |

**Table S11.** Continued

| atom  | $U_{11}$  | $U_{22}$   | $U_{33}$  | $U_{23}$   | $U_{13}$  | $U_{12}$   |
|-------|-----------|------------|-----------|------------|-----------|------------|
| C(33) | 0.0151(8) | 0.0358(12) | 0.0220(9) | 0.0023(8)  | 0.0052(7) | 0.0051(8)  |
| C(41) | 0.0265(9) | 0.0178(9)  | 0.0092(7) | 0.0024(6)  | 0.0088(6) | -0.0012(7) |
| C(42) | 0.0275(9) | 0.0215(9)  | 0.0138(8) | 0.0009(7)  | 0.0105(7) | 0.0024(7)  |
| C(43) | 0.0235(9) | 0.0367(12) | 0.0141(8) | -0.0009(8) | 0.0109(7) | -0.0003(8) |

<sup>a</sup>The estimated standard deviations of the least significant digits are given in parentheses. The anisotropic displacement factor exponent takes the form:  $-2 \pi [h^2 a^{*2} U_{11} + \dots + 2 h k a^* b^* U_{12}]$ .

**Table S11.** Hydrogen Atom Coordinates and Equivalent Isotropic Displacement Parameters ( $\text{\AA}^2$ ) for  $[\text{Fe}(\text{TPrP})(\text{Cl})]^a$

| atom   | $x$     | $y$    | $z$    | $U(\text{eq})$ |
|--------|---------|--------|--------|----------------|
| H(b1)  | 0.1403  | 0.1233 | 0.7628 | 0.023          |
| H(b2)  | 0.0416  | 0.1535 | 0.5883 | 0.021          |
| H(b3)  | 0.1547  | 0.1402 | 0.2749 | 0.018          |
| H(b4)  | 0.3260  | 0.0983 | 0.2477 | 0.019          |
| H(b5)  | 0.7430  | 0.0821 | 0.4704 | 0.024          |
| H(b6)  | 0.8447  | 0.1182 | 0.6430 | 0.024          |
| H(b7)  | 0.7322  | 0.1265 | 0.9555 | 0.020          |
| H(b8)  | 0.5574  | 0.0981 | 0.9831 | 0.019          |
| H(11a) | 0.0535  | 0.1996 | 0.3484 | 0.017          |
| H(11b) | 0.0197  | 0.2055 | 0.4432 | 0.017          |
| H(12a) | -0.0020 | 0.0484 | 0.4382 | 0.024          |
| H(12b) | 0.0222  | 0.0474 | 0.3382 | 0.024          |
| H(13a) | -0.1586 | 0.1386 | 0.3631 | 0.039          |
| H(13b) | -0.1691 | 0.0458 | 0.3092 | 0.039          |
| H(13c) | -0.1358 | 0.1317 | 0.2628 | 0.039          |
| H(21a) | 0.4846  | 0.0396 | 0.2808 | 0.017          |
| H(21b) | 0.6107  | 0.0378 | 0.3467 | 0.017          |
| H(22a) | 0.4997  | 0.1933 | 0.2528 | 0.019          |
| H(22b) | 0.6270  | 0.1889 | 0.3157 | 0.019          |
| H(23a) | 0.6544  | 0.0893 | 0.2008 | 0.030          |
| H(23b) | 0.6045  | 0.1799 | 0.1493 | 0.030          |
| H(23c) | 0.5274  | 0.0958 | 0.1375 | 0.030          |
| H(31a) | 0.8388  | 0.1804 | 0.8815 | 0.020          |
| H(31b) | 0.8714  | 0.1829 | 0.7859 | 0.020          |
| H(32a) | 0.8554  | 0.0259 | 0.8884 | 0.025          |
| H(32b) | 0.8802  | 0.0251 | 0.7888 | 0.025          |
| H(33a) | 1.0440  | 0.1066 | 0.8676 | 0.037          |
| H(33b) | 1.0458  | 0.0120 | 0.9158 | 0.037          |
| H(33c) | 1.0205  | 0.0978 | 0.9674 | 0.037          |
| H(41a) | 0.3912  | 0.0523 | 0.9488 | 0.021          |
| H(41b) | 0.2657  | 0.0579 | 0.8819 | 0.021          |
| H(42a) | 0.3902  | 0.2045 | 0.9845 | 0.024          |
| H(42b) | 0.2644  | 0.2102 | 0.9173 | 0.024          |
| H(43a) | 0.2183  | 0.1131 | 1.0239 | 0.035          |

**Table S11.** Continued

| atom   | $x$    | $y$    | $z$    | $U(\text{eq})$ |
|--------|--------|--------|--------|----------------|
| H(43b) | 0.2782 | 0.1985 | 1.0813 | 0.035          |
| H(43c) | 0.3441 | 0.1083 | 1.0912 | 0.035          |

<sup>a</sup> $U(\text{eq})$  is defined as one third of the trace of the orthogonalized  $\mathbf{U}_{ij}$  tensor. The estimated standard deviations of the least significant digits are given in parentheses.



**Table S13.** Complete Crystallographic Details for [Fe(THexP)(Cl)].

|                                           |                                                                      |
|-------------------------------------------|----------------------------------------------------------------------|
| formula                                   | $C_{44}H_{60}ClFeN_4 \cdot 0.1CH_2Cl_2$                              |
| FW, amu                                   | 744.75                                                               |
| $a$ , Å                                   | 10.246(7)                                                            |
| $b$ , Å                                   | 12.834(4)                                                            |
| $c$ , Å                                   | 17.420(15)                                                           |
| $\alpha$ , deg                            | 69.74(3)                                                             |
| $\beta$ , deg                             | 87.52(4)                                                             |
| $\gamma$ , deg                            | 84.89(3)                                                             |
| $V$ , Å <sup>3</sup>                      | 2140(2)                                                              |
| space group                               | $P\bar{1}$                                                           |
| $Z$                                       | 2                                                                    |
| $D_c$ , g/cm <sup>3</sup>                 | 1.156                                                                |
| F(000)                                    | 790                                                                  |
| $\mu$ , mm <sup>-1</sup>                  | 0.460                                                                |
| power and current settings                | 50 kV and 40 mA                                                      |
| detector distance, mm                     | 40                                                                   |
| detector tilt angle, deg                  | -25                                                                  |
| image time, sec                           | 40                                                                   |
| increment, deg                            | 0.2                                                                  |
| crystal dimensions, mm                    | $0.77 \times 0.33 \times 0.10$                                       |
| radiation                                 | MoK $\alpha$ , $\bar{\lambda} = 0.71073$ Å                           |
| temperature, K                            | 130(2)                                                               |
| diffractometer                            | Enraf Nonius FAST                                                    |
| $\theta$ range for collected data, deg    | 2.34–29.86                                                           |
| index range                               | $-14 \leq h \leq 14$<br>$-17 \leq k \leq 17$<br>$-23 \leq l \leq 13$ |
| total data collected                      | 19908                                                                |
| absorption correction                     | DIFABS                                                               |
| relative transmission coefficients (I)    | 1.000 and 0.650                                                      |
| unique data                               | 10732 ( $R_{\text{int}} = 0.082$ )                                   |
| unique observed data [ $I > 2\sigma(I)$ ] | 6108                                                                 |
| refinement method                         | Full-matrix least-squares on $F^2$                                   |
| data/restraints/parameters                | 10732/115/540                                                        |
| goodness-of-fit (based on $F^2$ )         | 1.026                                                                |
| $\max(\Delta\rho)$ , e/Å <sup>3</sup>     | 1.174                                                                |
| $\min(\Delta\rho)$ , e/Å <sup>3</sup>     | -1.010                                                               |
| final $R$ indices [ $I > 2\sigma(I)$ ]    | $R_1 = 0.1024$ , $wR_2 = 0.2659$                                     |
| final $R$ indices (all data)              | $R_1 = 0.1647$ , $wR_2 = 0.3239$                                     |

**Table S14.** Atomic Coordinates and Equivalent Isotropic Displacement Parameters ( $\text{\AA}^2$ ) for  $[\text{Fe}(\text{THexP})(\text{Cl})]^a$

| atom  | $x$         | $y$         | $z$        | $U(\text{eq})$ |
|-------|-------------|-------------|------------|----------------|
| Fe    | 0.34162(7)  | 0.32158(6)  | 0.46190(4) | 0.0370(2)      |
| Cl    | 0.18944(13) | 0.20416(11) | 0.52345(9) | 0.0492(4)      |
| N(1)  | 0.4732(4)   | 0.2286(4)   | 0.4131(2)  | 0.0373(9)      |
| N(2)  | 0.2707(4)   | 0.3998(4)   | 0.3452(3)  | 0.0407(9)      |
| N(3)  | 0.2784(4)   | 0.4658(3)   | 0.4833(3)  | 0.0383(9)      |
| N(4)  | 0.4768(4)   | 0.2933(4)   | 0.5520(3)  | 0.0401(9)      |
| C(b1) | 0.6186(5)   | 0.0848(5)   | 0.4074(3)  | 0.0447(12)     |
| C(b2) | 0.5647(6)   | 0.1319(5)   | 0.3341(4)  | 0.0509(13)     |
| C(b3) | 0.2054(7)   | 0.4314(5)   | 0.2143(4)  | 0.0574(15)     |
| C(b4) | 0.1262(6)   | 0.4999(5)   | 0.2432(4)  | 0.0562(15)     |
| C(b5) | 0.1369(7)   | 0.6142(5)   | 0.4870(4)  | 0.0591(16)     |
| C(b6) | 0.2238(7)   | 0.5921(5)   | 0.5483(4)  | 0.0552(15)     |
| C(b7) | 0.5674(6)   | 0.2830(7)   | 0.6721(4)  | 0.0627(17)     |
| C(b8) | 0.6148(7)   | 0.1917(6)   | 0.6556(4)  | 0.0639(18)     |
| C(a1) | 0.5629(5)   | 0.1458(4)   | 0.4577(3)  | 0.0382(10)     |
| C(a2) | 0.4705(5)   | 0.2198(5)   | 0.3364(3)  | 0.0449(12)     |
| C(a3) | 0.2945(6)   | 0.3676(5)   | 0.2778(3)  | 0.0469(12)     |
| C(a4) | 0.1670(5)   | 0.4810(4)   | 0.3240(3)  | 0.0420(11)     |
| C(a5) | 0.1727(6)   | 0.5370(5)   | 0.4455(3)  | 0.0454(12)     |
| C(a6) | 0.3109(6)   | 0.4965(4)   | 0.5481(3)  | 0.0453(12)     |
| C(a7) | 0.4792(5)   | 0.3468(5)   | 0.6081(3)  | 0.0449(12)     |
| C(a8) | 0.5623(5)   | 0.1991(5)   | 0.5800(3)  | 0.0440(11)     |
| C(m1) | 0.6006(5)   | 0.1283(4)   | 0.5372(3)  | 0.0427(11)     |
| C(m2) | 0.3896(7)   | 0.2854(6)   | 0.2718(4)  | 0.0567(15)     |
| C(m3) | 0.1147(5)   | 0.5410(5)   | 0.3733(4)  | 0.0474(12)     |
| C(m4) | 0.4059(5)   | 0.4444(4)   | 0.6064(3)  | 0.0411(11)     |
| C(1)  | 0.6999(5)   | 0.0296(4)   | 0.5779(3)  | 0.0440(11)     |
| C(2)  | 0.8415(5)   | 0.0648(5)   | 0.5681(3)  | 0.0479(12)     |
| C(3)  | 0.9443(5)   | -0.0298(5)  | 0.6052(4)  | 0.0565(15)     |
| C(4)  | 0.9195(7)   | -0.1043(6)  | 0.6915(4)  | 0.050(2)       |
| C(5)  | 1.0367(9)   | -0.1844(7)  | 0.7289(5)  | 0.060(2)       |
| C(6)  | 1.0799(10)  | -0.2642(7)  | 0.6854(6)  | 0.064(3)       |
| C(41) | 0.948(2)    | -0.1527(12) | 0.6325(14) | 0.054(7)       |
| C(51) | 1.070(2)    | -0.2169(17) | 0.6770(13) | 0.048(7)       |

**Table S14.** Continued

| atom   | $x$         | $y$        | $z$         | $U(\text{eq})$ |
|--------|-------------|------------|-------------|----------------|
| C(61)  | 1.078(3)    | -0.221(3)  | 0.7641(14)  | 0.070(9)       |
| C(13)  | 0.0007(7)   | 0.6288(5)  | 0.3402(4)   | 0.0617(16)     |
| C(14)  | 0.0436(9)   | 0.7394(5)  | 0.2850(5)   | 0.086(3)       |
| C(15)  | -0.0418(9)  | 0.8434(7)  | 0.2670(7)   | 0.108(3)       |
| C(16)  | -0.1654(9)  | 0.8406(12) | 0.2331(8)   | 0.146(6)       |
| C(17)  | -0.2610(10) | 0.9476(10) | 0.2098(9)   | 0.127(4)       |
| C(18)  | -0.3741(13) | 0.9332(12) | 0.1655(12)  | 0.191(8)       |
| C(19)  | 0.4234(6)   | 0.4916(5)  | 0.6738(3)   | 0.0504(13)     |
| C(20)  | 0.3322(6)   | 0.4476(6)  | 0.7463(3)   | 0.0527(14)     |
| C(21)  | 0.3475(6)   | 0.4997(6)  | 0.8115(3)   | 0.0576(15)     |
| C(22)  | 0.2461(9)   | 0.4637(9)  | 0.8796(5)   | 0.097(3)       |
| C(23)  | 0.2542(13)  | 0.5117(13) | 0.9461(6)   | 0.140(5)       |
| C(24)  | 0.223(3)    | 0.6318(15) | 0.9235(13)  | 0.193(18)      |
| C(240) | 0.1246(18)  | 0.520(2)   | 0.9896(12)  | 0.083(8)       |
| C(80)  | 0.4205(14)  | 0.2799(11) | 0.1871(7)   | 0.046(3)       |
| C(81)  | 0.3420(12)  | 0.1942(13) | 0.1723(8)   | 0.060(3)       |
| C(82)  | 0.3546(16)  | 0.1935(15) | 0.0861(9)   | 0.085(5)       |
| C(83)  | 0.2954(17)  | 0.0999(16) | 0.0718(11)  | 0.103(6)       |
| C(84)  | 0.153(2)    | 0.096(3)   | 0.0751(13)  | 0.132(11)      |
| C(85)  | 0.063(2)    | 0.175(2)   | 0.0305(14)  | 0.124(9)       |
| C(90)  | 0.3734(17)  | 0.2379(14) | 0.2009(9)   | 0.062(4)       |
| C(91)  | 0.4804(15)  | 0.2847(12) | 0.1362(7)   | 0.066(3)       |
| C(92)  | 0.4725(15)  | 0.2399(14) | 0.0652(7)   | 0.070(4)       |
| C(93)  | 0.5840(15)  | 0.2731(15) | 0.0032(8)   | 0.081(5)       |
| C(94)  | 0.5799(16)  | 0.2119(14) | -0.0598(9)  | 0.075(4)       |
| C(95)  | 0.6990(19)  | 0.228(3)   | -0.1136(12) | 0.142(12)      |
| Cl(1)  | 0.608(3)    | 0.296(2)   | -0.0990(16) | 0.153(8)       |
| Cl(2)  | 0.746(4)    | 0.080(3)   | -0.073(3)   | 0.27(2)        |
| C(100) | 0.741(4)    | 0.207(3)   | -0.054(3)   | 0.044(11)      |

<sup>a</sup> $U(\text{eq})$  is defined as one third of the trace of the orthogonalized  $\mathbf{U}_{ij}$  tensor. The estimated standard deviations of the least significant digits are given in parentheses.

**Table S15.** Bond Lengths for [Fe(THexP)(Cl)]<sup>a</sup>

| bond        | length (Å) | bond         | length (Å) |
|-------------|------------|--------------|------------|
| Fe–N(4)     | 2.054(5)   | C(4m)–C(19)  | 1.519(7)   |
| Fe–N(3)     | 2.056(4)   | C(1)–C(2)    | 1.543(7)   |
| Fe–N(2)     | 2.063(5)   | C(2)–C(3)    | 1.512(7)   |
| Fe–N(1)     | 2.068(4)   | C(3)–C(41)   | 1.479(14)  |
| Fe–Cl       | 2.2375(18) | C(3)–C(4)    | 1.502(8)   |
| N(1)–C(a1)  | 1.376(7)   | C(4)–C(5)    | 1.520(9)   |
| N(1)–C(a2)  | 1.381(6)   | C(5)–C(6)    | 1.500(10)  |
| N(2)–C(a3)  | 1.379(7)   | C(41)–C(51)  | 1.515(14)  |
| N(2)–C(a4)  | 1.386(7)   | C(51)–C(61)  | 1.508(15)  |
| N(3)–C(a6)  | 1.380(7)   | C(13)–C(14)  | 1.504(9)   |
| N(3)–C(a5)  | 1.382(7)   | C(14)–C(15)  | 1.474(9)   |
| N(4)–C(a7)  | 1.376(7)   | C(15)–C(16)  | 1.428(11)  |
| N(4)–C(a8)  | 1.382(7)   | C(16)–C(17)  | 1.555(12)  |
| C(b1)–C(b2) | 1.330(8)   | C(17)–C(18)  | 1.479(12)  |
| C(b1)–C(a1) | 1.434(7)   | C(19)–C(20)  | 1.512(7)   |
| C(b2)–C(a2) | 1.429(8)   | C(20)–C(21)  | 1.524(7)   |
| C(b3)–C(b4) | 1.353(9)   | C(21)–C(22)  | 1.517(8)   |
| C(b3)–C(a3) | 1.434(8)   | C(22)–C(23)  | 1.497(10)  |
| C(b4)–C(a4) | 1.418(8)   | C(23)–C(24)  | 1.461(14)  |
| C(b5)–C(b6) | 1.357(9)   | C(23)–C(240) | 1.513(13)  |
| C(b5)–C(a5) | 1.431(8)   | C(80)–C(81)  | 1.515(14)  |
| C(b6)–C(a6) | 1.453(8)   | C(81)–C(82)  | 1.505(14)  |
| C(b7)–C(b8) | 1.346(9)   | C(82)–C(83)  | 1.492(15)  |
| C(b7)–C(a7) | 1.433(9)   | C(83)–C(84)  | 1.465(16)  |
| C(b8)–C(a8) | 1.412(8)   | C(83)–CL2#1) | 2.38(4)    |
| C(a1)–C(m1) | 1.391(8)   | C(84)–C(85)  | 1.34(3)    |
| C(a2)–C(m2) | 1.401(9)   | C(84)–CL2#1) | 2.42(4)    |
| C(a3)–C(m2) | 1.399(8)   | C(90)–C(91)  | 1.541(13)  |
| C(a4)–C(m3) | 1.401(8)   | C(91)–C(92)  | 1.541(12)  |
| C(a5)–C(m3) | 1.397(8)   | C(92)–C(93)  | 1.521(13)  |
| C(a6)–C(m4) | 1.388(8)   | C(93)–C(94)  | 1.558(13)  |
| C(a7)–C(m4) | 1.394(8)   | C(94)–C(95)  | 1.492(14)  |
| C(a8)–C(m1) | 1.385(7)   | CL1)–C(100)  | 1.73(2)    |
| C(m1)–C(1)  | 1.534(7)   | CL1)–CL2)    | 2.889(19)  |

**Table S15.** Continued

| bond        | length (Å) | bond          | length (Å) |
|-------------|------------|---------------|------------|
| C(m2)–C(80) | 1.521(12)  | CL2)–C(100)   | 1.76(2)    |
| C(m2)–C(90) | 1.576(17)  | CL2)–C(83)#1) | 2.38(4)    |
| C(m3)–C(13) | 1.530(8)   | CL2)–C(84)#1) | 2.42(4)    |

<sup>a</sup>The estimated standard deviations of the least significant digits are given in parentheses.

**Table S16.** Bond Angles for [Fe(THexP)(Cl)]<sup>a</sup>

| angle             | degree     | angle              | degree    |
|-------------------|------------|--------------------|-----------|
| N(4)–Fe–N(3)      | 87.23(18)  | C(a1)–C(m1)–C(1)   | 118.2(5)  |
| N(4)–Fe–N(2)      | 153.32(17) | C(a3)–C(m2)–C(a2)  | 123.8(5)  |
| N(3)–Fe–N(2)      | 86.41(17)  | C(a3)–C(m2)–C(80)  | 117.4(7)  |
| N(4)–Fe–N(1)      | 86.31(17)  | C(a2)–C(m2)–C(80)  | 118.1(7)  |
| N(3)–Fe–N(1)      | 152.14(17) | C(a3)–C(m2)–C(90)  | 116.8(8)  |
| N(2)–Fe–N(1)      | 87.32(17)  | C(a2)–C(m2)–C(90)  | 116.3(8)  |
| N(4)–Fe–Cl        | 103.35(14) | C(80)–C(m2)–C(90)  | 27.1(5)   |
| N(3)–Fe–Cl        | 103.99(13) | C(a5)–C(m3)–C(a4)  | 123.4(5)  |
| N(2)–Fe–Cl        | 103.33(13) | C(a5)–C(m3)–C(13)  | 117.6(5)  |
| N(1)–Fe–Cl        | 103.87(13) | C(a4)–C(m3)–C(13)  | 118.3(5)  |
| C(a1)–N(1)–C(a2)  | 106.5(4)   | C(a6)–C(m4)–C(a7)  | 122.2(5)  |
| C(a1)–N(1)–Fe     | 124.9(3)   | C(a6)–C(m4)–C(19)  | 118.4(5)  |
| C(a2)–N(1)–Fe     | 127.3(4)   | C(a7)–C(m4)–C(19)  | 119.2(5)  |
| C(a3)–N(2)–C(a4)  | 105.7(4)   | C(m1)–C(1)–C(2)    | 111.9(4)  |
| C(a3)–N(2)–Fe     | 127.7(4)   | C(3)–C(2)–C(1)     | 114.3(5)  |
| C(a4)–N(2)–Fe     | 125.3(4)   | C(41)–C(3)–C(4)    | 55.2(10)  |
| C(a6)–N(3)–C(a5)  | 106.7(4)   | C(41)–C(3)–C(2)    | 134.9(9)  |
| C(a6)–N(3)–Fe     | 127.2(4)   | C(4)–C(3)–C(2)     | 116.6(5)  |
| C(a5)–N(3)–Fe     | 124.6(4)   | C(3)–C(4)–C(5)     | 113.2(6)  |
| C(a7)–N(4)–C(a8)  | 106.4(4)   | C(6)–C(5)–C(4)     | 114.7(7)  |
| C(a7)–N(4)–Fe     | 127.3(4)   | C(3)–C(41)–C(51)   | 116.6(14) |
| C(a8)–N(4)–Fe     | 124.6(4)   | C(61)–C(51)–C(41)  | 114.7(14) |
| C(b2)–C(b1)–C(a1) | 106.8(5)   | C(14)–C(13)–C(m3)  | 113.5(6)  |
| C(b1)–C(b2)–C(a2) | 109.0(5)   | C(15)–C(14)–C(13)  | 122.3(8)  |
| C(b4)–C(b3)–C(a3) | 107.9(5)   | C(16)–C(15)–C(14)  | 114.4(9)  |
| C(b3)–C(b4)–C(a4) | 106.8(5)   | C(15)–C(16)–C(17)  | 118.3(11) |
| C(b6)–C(b5)–C(a5) | 106.7(5)   | C(18)–C(17)–C(16)  | 109.9(10) |
| C(b5)–C(b6)–C(a6) | 107.9(5)   | C(20)–C(19)–C(m4)  | 113.3(4)  |
| C(b8)–C(b7)–C(a7) | 107.8(5)   | C(19)–C(20)–C(21)  | 112.4(5)  |
| C(b7)–C(b8)–C(a8) | 107.4(6)   | C(22)–C(21)–C(20)  | 111.8(6)  |
| N(1)–C(a1)–C(m1)  | 125.5(4)   | C(23)–C(22)–C(21)  | 115.1(7)  |
| N(1)–C(a1)–C(b1)  | 109.5(4)   | C(24)–C(23)–C(22)  | 116.5(12) |
| C(m1)–C(a1)–C(b1) | 124.9(5)   | C(24)–C(23)–C(240) | 77.1(15)  |
| N(1)–C(a2)–C(m2)  | 126.2(5)   | C(22)–C(23)–C(240) | 113.3(11) |

**Table S16.** Continued

| angle             | degree   | angle                 | degree    |
|-------------------|----------|-----------------------|-----------|
| N(1)–C(a2)–C(b2)  | 108.2(5) | C(81)–C(80)–C(m2)     | 110.2(10) |
| C(m2)–C(a2)–C(b2) | 125.6(5) | C(82)–C(81)–C(80)     | 113.3(11) |
| N(2)–C(a3)–C(m2)  | 125.9(5) | C(83)–C(82)–C(81)     | 115.2(13) |
| N(2)–C(a3)–C(b3)  | 109.2(5) | C(84)–C(83)–C(82)     | 119.6(14) |
| C(m2)–C(a3)–C(b3) | 124.9(5) | C(84)–C(83)–Cl(2)#1   | 73.6(17)  |
| N(2)–C(a4)–C(m3)  | 124.9(5) | C(82)–C(83)–Cl(2)#1   | 163.0(17) |
| N(2)–C(a4)–C(b4)  | 110.5(5) | C(85)–C(84)–C(83)     | 128(2)    |
| C(m3)–C(a4)–C(b4) | 124.5(5) | C(85)–C(84)–Cl(2)#1   | 136.4(19) |
| N(3)–C(a5)–C(m3)  | 125.9(5) | C(83)–C(84)–Cl(2)#1   | 70.8(18)  |
| N(3)–C(a5)–C(b5)  | 110.1(5) | C(91)–C(90)–C(2m)     | 106.9(12) |
| C(m3)–C(a5)–C(5b) | 123.8(5) | C(92)–C(91)–C(90)     | 110.0(11) |
| N(3)–C(a6)–C(m4)  | 127.3(5) | C(93)–C(92)–C(91)     | 113.0(11) |
| N(3)–C(a6)–C(b6)  | 108.4(5) | C(92)–C(93)–C(94)     | 109.8(12) |
| C(m4)–C(a6)–C(b6) | 124.2(5) | C(95)–C(94)–C(93)     | 111.5(13) |
| N(4)–C(a7)–C(m4)  | 127.0(5) | C(100)–Cl(1)–Cl(2)    | 34.5(9)   |
| N(4)–C(a7)–C(b7)  | 108.6(5) | C(100)–Cl(2)–C(83)#1  | 164(3)    |
| C(m4)–C(a7)–C(b7) | 124.4(5) | C(100)–Cl(2)–C(84)#1  | 155(2)    |
| N(4)–C(a8)–C(m1)  | 125.3(5) | C(83)#1–Cl(2)–C(84)#1 | 35.5(6)   |
| N(4)–C(a8)–C(b8)  | 109.7(5) | C(100)–Cl(2)–Cl(1)    | 33.7(9)   |
| C(m1)–C(a8)–C(b8) | 124.8(5) | C(83)#1–Cl(2)–Cl(1)   | 139(2)    |
| C(a8)–C(m1)–C(a1) | 124.3(5) | C(84)#1–Cl(2)–Cl(1)   | 170(2)    |
| C(a8)–C(m1)–C(1)  | 117.4(5) | Cl(1)–C(100)–Cl(2)    | 111.8(17) |

<sup>a</sup>The estimated standard deviations of the least significant digits are given in parentheses.

**Table S17.** Anisotropic Displacement Parameters ( $\text{\AA}^2$ ) for  $[\text{Fe}(\text{THeXP})(\text{Cl})]^a$ 

| atom  | $U_{11}$  | $U_{22}$  | $U_{33}$  | $U_{23}$    | $U_{13}$   | $U_{12}$    |
|-------|-----------|-----------|-----------|-------------|------------|-------------|
| Fe    | 0.0371(4) | 0.0322(4) | 0.0419(4) | -0.0132(3)  | 0.0050(3)  | -0.0048(3)  |
| Cl    | 0.0433(7) | 0.0357(6) | 0.0673(9) | -0.0167(6)  | 0.0150(6)  | -0.0081(5)  |
| N(1)  | 0.038(2)  | 0.040(2)  | 0.036(2)  | -0.0157(17) | 0.0042(16) | -0.0050(17) |
| N(2)  | 0.036(2)  | 0.038(2)  | 0.050(2)  | -0.0183(19) | 0.0009(18) | -0.0031(17) |
| N(3)  | 0.042(2)  | 0.033(2)  | 0.041(2)  | -0.0142(17) | 0.0031(17) | -0.0077(17) |
| N(4)  | 0.040(2)  | 0.039(2)  | 0.042(2)  | -0.0147(18) | 0.0063(17) | -0.0053(18) |
| C(b1) | 0.043(3)  | 0.041(3)  | 0.054(3)  | -0.021(2)   | 0.003(2)   | -0.001(2)   |
| C(b2) | 0.055(3)  | 0.053(3)  | 0.053(3)  | -0.030(3)   | 0.006(3)   | 0.000(3)    |
| C(b3) | 0.067(4)  | 0.055(4)  | 0.053(3)  | -0.022(3)   | -0.014(3)  | -0.001(3)   |
| C(b4) | 0.059(4)  | 0.046(3)  | 0.067(4)  | -0.022(3)   | -0.018(3)  | -0.001(3)   |
| C(b5) | 0.077(4)  | 0.042(3)  | 0.054(3)  | -0.016(3)   | 0.004(3)   | 0.014(3)    |
| C(b6) | 0.079(4)  | 0.038(3)  | 0.050(3)  | -0.018(2)   | 0.005(3)   | 0.006(3)    |
| C(b7) | 0.057(4)  | 0.087(5)  | 0.057(4)  | -0.042(4)   | -0.010(3)  | 0.002(3)    |
| C(b8) | 0.062(4)  | 0.081(5)  | 0.047(3)  | -0.027(3)   | -0.008(3)  | 0.022(3)    |
| C(a1) | 0.040(2)  | 0.031(2)  | 0.040(2)  | -0.0087(19) | 0.004(2)   | -0.0025(19) |
| C(a2) | 0.048(3)  | 0.045(3)  | 0.046(3)  | -0.021(2)   | 0.005(2)   | -0.002(2)   |
| C(a3) | 0.052(3)  | 0.043(3)  | 0.047(3)  | -0.017(2)   | -0.008(2)  | 0.003(2)    |
| C(a4) | 0.040(3)  | 0.037(3)  | 0.050(3)  | -0.015(2)   | -0.010(2)  | -0.005(2)   |
| C(a5) | 0.048(3)  | 0.041(3)  | 0.045(3)  | -0.015(2)   | 0.004(2)   | 0.000(2)    |
| C(a6) | 0.056(3)  | 0.035(2)  | 0.049(3)  | -0.019(2)   | 0.014(2)   | -0.013(2)   |
| C(a7) | 0.040(3)  | 0.053(3)  | 0.042(3)  | -0.016(2)   | 0.003(2)   | -0.006(2)   |
| C(a8) | 0.041(3)  | 0.051(3)  | 0.040(3)  | -0.018(2)   | -0.003(2)  | 0.003(2)    |
| C(m1) | 0.042(3)  | 0.039(3)  | 0.044(3)  | -0.010(2)   | 0.005(2)   | -0.004(2)   |
| C(m2) | 0.064(4)  | 0.063(4)  | 0.045(3)  | -0.023(3)   | -0.003(3)  | 0.007(3)    |
| C(m3) | 0.043(3)  | 0.038(3)  | 0.061(3)  | -0.016(2)   | 0.000(2)   | -0.002(2)   |
| C(m4) | 0.038(2)  | 0.041(3)  | 0.048(3)  | -0.019(2)   | 0.004(2)   | -0.015(2)   |
| C(1)  | 0.041(3)  | 0.040(3)  | 0.048(3)  | -0.012(2)   | 0.003(2)   | 0.002(2)    |
| C(2)  | 0.047(3)  | 0.043(3)  | 0.053(3)  | -0.015(2)   | 0.005(2)   | -0.004(2)   |
| C(3)  | 0.043(3)  | 0.048(3)  | 0.068(4)  | -0.008(3)   | 0.003(3)   | 0.003(2)    |
| C(4)  | 0.054(4)  | 0.052(4)  | 0.043(4)  | -0.014(3)   | -0.002(3)  | 0.004(3)    |
| C(5)  | 0.062(5)  | 0.065(5)  | 0.046(5)  | -0.012(4)   | -0.008(4)  | 0.009(4)    |
| C(6)  | 0.076(6)  | 0.042(5)  | 0.063(5)  | -0.004(4)   | 0.001(4)   | 0.009(4)    |
| C(13) | 0.060(4)  | 0.057(4)  | 0.066(4)  | -0.022(3)   | -0.008(3)  | 0.016(3)    |
| C(14) | 0.135(8)  | 0.048(4)  | 0.070(5)  | -0.021(3)   | -0.041(5)  | 0.034(4)    |



**Table S17.** Continued

| atom   | $U_{11}$  | $U_{22}$  | $U_{33}$  | $U_{23}$   | $U_{13}$   | $U_{12}$   |
|--------|-----------|-----------|-----------|------------|------------|------------|
| C(15)  | 0.117(8)  | 0.080(6)  | 0.115(8)  | -0.024(6)  | 0.011(6)   | 0.007(6)   |
| C(16)  | 0.076(7)  | 0.250(19) | 0.124(9)  | -0.080(11) | -0.012(6)  | -0.009(9)  |
| C(17)  | 0.092(7)  | 0.126(10) | 0.187(13) | -0.090(9)  | -0.036(8)  | 0.032(7)   |
| C(18)  | 0.123(11) | 0.110(10) | 0.30(2)   | -0.007(12) | -0.091(13) | -0.002(8)  |
| C(19)  | 0.058(3)  | 0.050(3)  | 0.052(3)  | -0.026(3)  | 0.015(3)   | -0.023(3)  |
| C(20)  | 0.055(3)  | 0.061(4)  | 0.048(3)  | -0.025(3)  | 0.010(3)   | -0.016(3)  |
| C(21)  | 0.060(4)  | 0.074(4)  | 0.045(3)  | -0.029(3)  | 0.003(3)   | -0.005(3)  |
| C(22)  | 0.091(6)  | 0.155(10) | 0.067(5)  | -0.061(6)  | 0.029(4)   | -0.041(6)  |
| C(23)  | 0.146(11) | 0.217(16) | 0.103(8)  | -0.111(10) | 0.042(8)   | -0.041(11) |
| C(24)  | 0.16(2)   | 0.30(4)   | 0.14(2)   | -0.13(3)   | -0.035(18) | 0.09(3)    |
| C(240) | 0.094(17) | 0.109(19) | 0.050(11) | -0.034(12) | 0.013(10)  | -0.014(14) |
| C(80)  | 0.060(8)  | 0.041(7)  | 0.030(6)  | -0.008(5)  | 0.006(5)   | 0.005(6)   |
| C(81)  | 0.050(7)  | 0.078(9)  | 0.069(8)  | -0.048(8)  | -0.001(6)  | -0.008(6)  |
| C(82)  | 0.094(12) | 0.104(13) | 0.084(11) | -0.067(10) | -0.022(9)  | 0.009(10)  |
| C(83)  | 0.122(17) | 0.117(17) | 0.086(12) | -0.056(12) | -0.017(11) | -0.004(13) |
| C(84)  | 0.16(2)   | 0.20(3)   | 0.088(14) | -0.094(18) | 0.051(14)  | -0.12(2)   |
| C(85)  | 0.13(2)   | 0.12(2)   | 0.102(17) | -0.031(14) | 0.042(15)  | 0.010(15)  |
| C(90)  | 0.069(10) | 0.054(9)  | 0.053(9)  | -0.008(8)  | 0.011(7)   | -0.008(7)  |
| C(91)  | 0.080(10) | 0.062(8)  | 0.055(8)  | -0.017(6)  | 0.007(7)   | -0.012(7)  |
| C(92)  | 0.099(11) | 0.080(10) | 0.046(7)  | -0.036(7)  | 0.004(7)   | -0.032(8)  |
| C(93)  | 0.090(11) | 0.112(14) | 0.049(8)  | -0.036(8)  | -0.003(7)  | -0.015(10) |
| C(94)  | 0.101(12) | 0.070(10) | 0.064(9)  | -0.029(8)  | 0.003(8)   | -0.028(9)  |
| C(95)  | 0.089(14) | 0.29(4)   | 0.090(14) | -0.12(2)   | 0.018(11)  | -0.022(18) |

<sup>a</sup>The estimated standard deviations of the least significant digits are given in parentheses. The anisotropic displacement factor exponent takes the form:  $-2 \pi [h^2 a^{*2} U_{11} + \dots + 2 h k a^* b^* U_{12}]$ .

**Table S18.** Atomic Coordinates and Equivalent Isotropic Displacement Parameters ( $\text{\AA}^2$ ) for  $[\text{Fe}(\text{THexP})(\text{Cl})]^a$

| atom   | $x$     | $y$     | $z$    | $U(\text{eq})$ |
|--------|---------|---------|--------|----------------|
| H(b1)  | 0.6818  | 0.0227  | 0.4234 | 0.054          |
| H(b2)  | 0.5855  | 0.1105  | 0.2877 | 0.061          |
| H(b3)  | 0.2025  | 0.4264  | 0.1612 | 0.069          |
| H(b4)  | 0.0567  | 0.5509  | 0.2148 | 0.067          |
| H(b5)  | 0.0660  | 0.6702  | 0.4741 | 0.071          |
| H(b6)  | 0.2270  | 0.6321  | 0.5849 | 0.066          |
| H(b7)  | 0.5885  | 0.3017  | 0.7180 | 0.075          |
| H(b8)  | 0.6729  | 0.1330  | 0.6886 | 0.077          |
| H(1a)  | 0.6938  | -0.0286 | 0.5532 | 0.053          |
| H(1c)  | 0.6778  | -0.0029 | 0.6369 | 0.053          |
| H(2a)  | 0.8615  | 0.0997  | 0.5091 | 0.057          |
| H(2c)  | 0.8471  | 0.1219  | 0.5939 | 0.057          |
| H(3a)  | 0.9527  | -0.0764 | 0.5704 | 0.083          |
| H(3c)  | 1.0280  | 0.0023  | 0.6039 | 0.083          |
| H(4a)  | 0.8440  | -0.1478 | 0.6922 | 0.060          |
| H(4c)  | 0.8956  | -0.0576 | 0.7256 | 0.060          |
| H(5a)  | 1.1111  | -0.1405 | 0.7296 | 0.072          |
| H(5c)  | 1.0148  | -0.2277 | 0.7864 | 0.072          |
| H(6a)  | 1.1563  | -0.3119 | 0.7128 | 0.097          |
| H(6c)  | 1.1033  | -0.2224 | 0.6286 | 0.097          |
| H(6d)  | 1.0084  | -0.3105 | 0.6863 | 0.097          |
| H(41a) | 0.9373  | -0.1742 | 0.5839 | 0.065          |
| H(41b) | 0.8712  | -0.1767 | 0.6691 | 0.065          |
| H(51a) | 1.0726  | -0.2943 | 0.6770 | 0.058          |
| H(51b) | 1.1476  | -0.1828 | 0.6462 | 0.058          |
| H(61a) | 1.1594  | -0.2638 | 0.7884 | 0.105          |
| H(61b) | 1.0029  | -0.2562 | 0.7958 | 0.105          |
| H(61c) | 1.0784  | -0.1447 | 0.7649 | 0.105          |
| H(13a) | -0.0583 | 0.6008  | 0.3095 | 0.074          |
| H(13b) | -0.0500 | 0.6397  | 0.3869 | 0.074          |
| H(14a) | 0.1251  | 0.7515  | 0.3083 | 0.103          |
| H(14b) | 0.0682  | 0.7310  | 0.2318 | 0.103          |
| H(15a) | -0.0576 | 0.8599  | 0.3182 | 0.129          |
| H(15b) | 0.0047  | 0.9051  | 0.2282 | 0.129          |

**Table S18.** Continued

| atom   | $x$             | $y$    | $z$     | $U(\text{eq})$ |
|--------|-----------------|--------|---------|----------------|
| H(16a) | -0.2113         | 0.7794 | 0.2729  | 0.175          |
| H(16b) | -0.1481         | 0.8208 | 0.1833  | 0.175          |
| H(17a) | -0.2921         | 0.9623 | 0.2599  | 0.152          |
| H(17b) | -0.2148         | 1.0122 | 0.1748  | 0.152          |
| H(18d) | -0.4497         | 0.9817 | 0.1725  | 0.286          |
| H(18e) | -0.3958         | 0.8554 | 0.1875  | 0.286          |
| H(18f) | -0.3519         | 0.9530 | 0.1072  | 0.286          |
| H(19a) | 0.5150          | 0.4735 | 0.6928  | 0.061          |
| H(19b) | 0.4081          | 0.5738 | 0.6510  | 0.061          |
| H(20a) | 0.3500          | 0.3658 | 0.7708  | 0.063          |
| H(20b) | 0.2405          | 0.4630 | 0.7272  | 0.063          |
| H(21a) | 0.4363          | 0.4777 | 0.8349  | 0.069          |
| H(21b) | 0.3386          | 0.5818 | 0.7859  | 0.069          |
| H(22a) | 0.1579          | 0.4850 | 0.8554  | 0.117          |
| H(22b) | 0.2556          | 0.3814 | 0.9044  | 0.117          |
| H(23a) | <i>H</i> 0.1900 | 0.4751 | 0.9892  | 0.168          |
| H(23b) | <i>H</i> 0.3408 | 0.4938 | 0.9679  | 0.168          |
| H(24a) | 0.2331          | 0.6540 | 0.9713  | 0.290          |
| H(24b) | 0.1329          | 0.6509 | 0.9043  | 0.290          |
| H(24c) | 0.2832          | 0.6710 | 0.8798  | 0.290          |
| H(24d) | 0.0980          | 0.4444 | 1.0193  | 0.124          |
| H(24e) | 0.0579          | 0.5609 | 0.9493  | 0.124          |
| H(24f) | 0.1339          | 0.5585 | 1.0283  | 0.124          |
| H(80a) | 0.3989          | 0.3539 | 0.1451  | 0.055          |
| H(80b) | 0.5152          | 0.2596 | 0.1823  | 0.055          |
| H(81a) | 0.3715          | 0.1193 | 0.2105  | 0.071          |
| H(81b) | 0.2484          | 0.2093 | 0.1846  | 0.071          |
| H(82a) | 0.3129          | 0.2646 | 0.0489  | 0.102          |
| H(82b) | 0.4488          | 0.1905 | 0.0711  | 0.102          |
| H(83a) | 0.3257          | 0.0993 | 0.0172  | 0.123          |
| H(83b) | 0.3326          | 0.0297 | 0.1125  | 0.123          |
| H(84a) | 0.1362          | 0.0273 | 0.0652  | 0.159          |
| H(84b) | 0.1271          | 0.0839 | 0.1329  | 0.159          |
| H(85a) | -0.0245         | 0.1488 | 0.0448  | 0.186          |
| H(85b) | 0.0809          | 0.1884 | -0.0278 | 0.186          |
| H(85c) | 0.0689          | 0.2438 | 0.0418  | 0.186          |

**Table S18.** Continued

| atom   | $x$    | $y$    | $z$     | $U(\text{eq})$ |
|--------|--------|--------|---------|----------------|
| H(90a) | 0.3840 | 0.1554 | 0.2223  | 0.074          |
| H(90b) | 0.2854 | 0.2616 | 0.1766  | 0.074          |
| H(91a) | 0.4685 | 0.3671 | 0.1150  | 0.080          |
| H(91b) | 0.5678 | 0.2624 | 0.1616  | 0.080          |
| H(92a) | 0.4742 | 0.1576 | 0.0879  | 0.084          |
| H(92b) | 0.3881 | 0.2685 | 0.0371  | 0.084          |
| H(93a) | 0.6690 | 0.2531 | 0.0317  | 0.097          |
| H(93b) | 0.5756 | 0.3547 | -0.0257 | 0.097          |
| H(94a) | 0.5733 | 0.1314 | -0.0302 | 0.090          |
| H(94b) | 0.5010 | 0.2409 | -0.0940 | 0.090          |
| H(95a) | 0.6932 | 0.1888 | -0.1526 | 0.213          |
| H(95b) | 0.7771 | 0.1977 | -0.0801 | 0.213          |
| H(95c) | 0.7051 | 0.3075 | -0.1436 | 0.213          |

<sup>a</sup>  $U(\text{eq})$  is defined as one third of the trace of the orthogonalized  $\mathbf{U}_{ij}$  tensor. The estimated standard deviations of the least significant digits are given in parentheses.
